# Supplementary material
Source: Springer Nature journal article supplement (https://www.springermedizin.de/resource/supplementary/12916_2011_426_MOESM2_ESM.pdf/9599930)

**A.**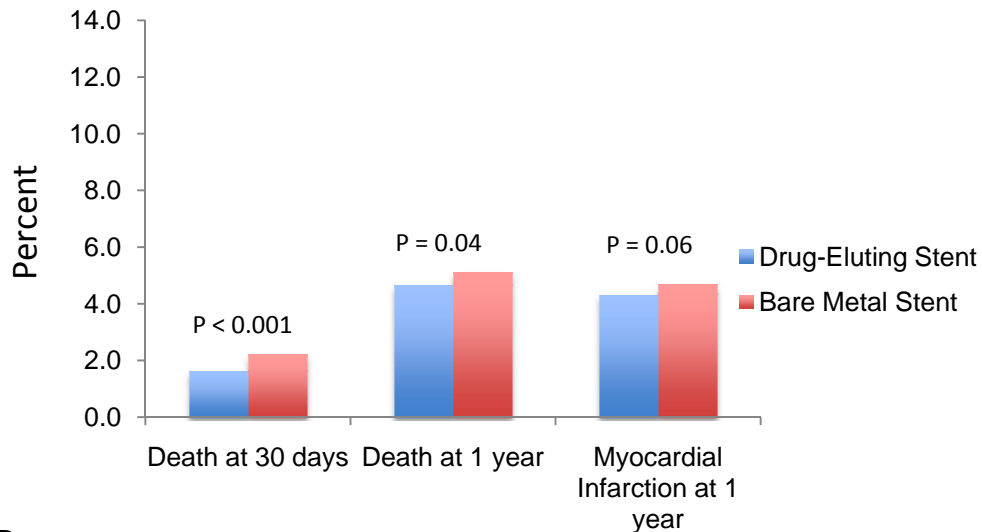**B.**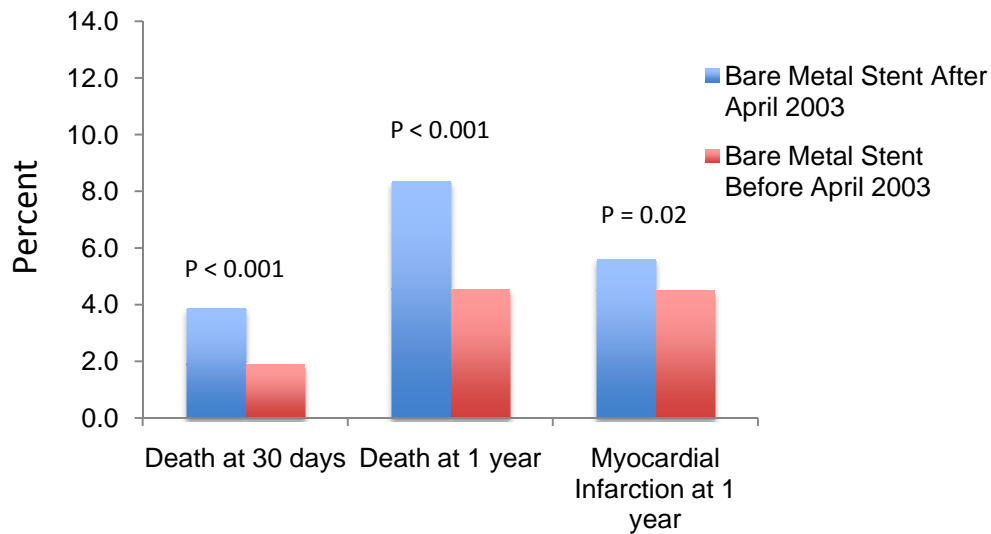

Supplement: MOESM2 [file 9599930]
